# Supplementary material for: A facile strategy to construct silk fibroin based GTR membranes with appropriate mechanical performance and enhanced osteogenic capacity
Source: Royal Society of Chemistry journal article supplement (doi:10.1039/d0tb01962c), 2020-01-01
Supplement: d0tb01962c1.pdf [file d0tb01962c1.pdf]

ARTICLE

## **A facile silk fibroin based GTR membranes with appropriate mechanical performance and enhanced osteogenic capacity**

Xiaoran Zheng<sup>a</sup>, Xiang Ke<sup>a</sup>, Peng Yu<sup>a</sup>, Dingqian Wang<sup>a</sup>, Siyu Pan<sup>a</sup>, Jiaojiao Yang<sup>b</sup>, Chunmei Ding<sup>a</sup>, Shimeng Xiao<sup>b,c</sup>, Jun Luo<sup>\*a</sup> and Jianshu Li<sup>\*a,b</sup>

---

<sup>a</sup>College of Polymer Science and Engineering, State Key Laboratory of Polymer Materials Engineering, Sichuan University, Chengdu 610065, P.R. China.

E-mail: [jianshu\\_li@scu.edu.cn](mailto:jianshu_li@scu.edu.cn), [luojuncd@scu.edu.cn](mailto:luojuncd@scu.edu.cn)

<sup>b</sup>State Key Laboratory of Oral Diseases, West China Hospital of Stomatology, Sichuan University, Chengdu 610041, China.

<sup>c</sup>Dept. of Periodontology, West China Hospital of Stomatology, Sichuan University, Chengdu 610041, China

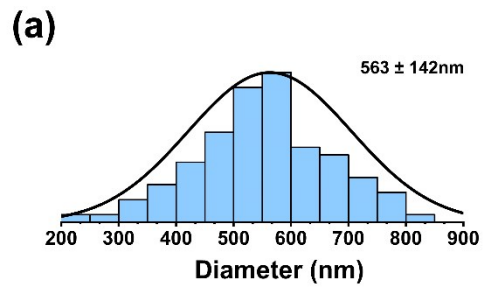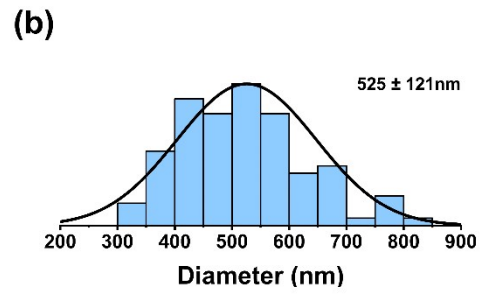

**Figure S1** Diameter distribution of (a) SF and (b) ST films.

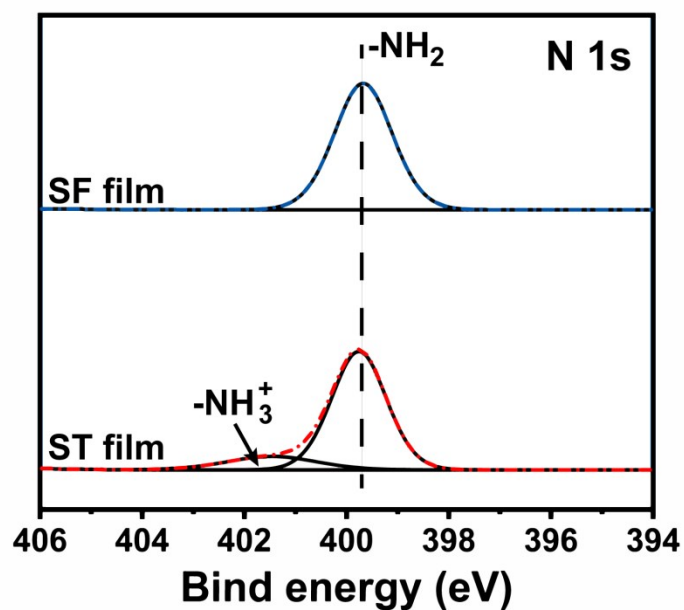

**Figure S2** High-resolution XPS spectra (N 1s) of SF and ST films.

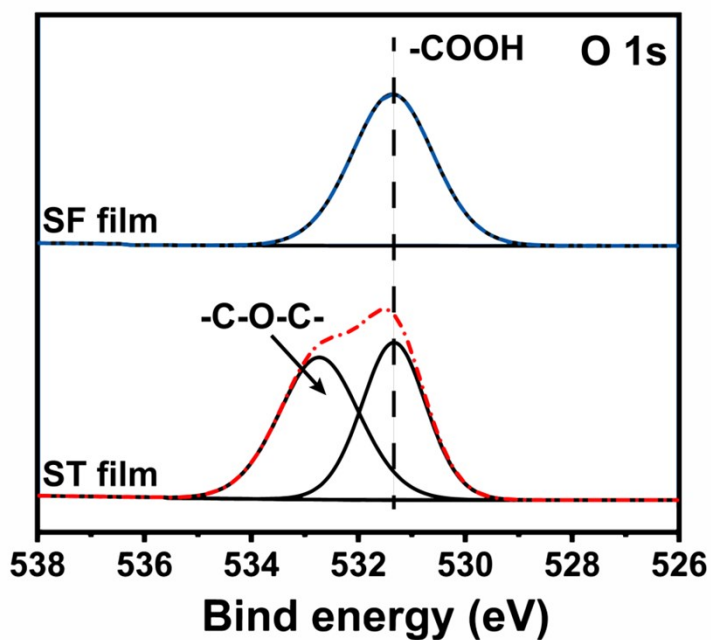

**Figure S3** High-resolution XPS spectra (O 1s) of SF and ST films. The new peak of the ST film appeared at 532.8 eV (corresponding to -C-O-C- groups in TA) suggests a successful coating of TA on the SF membrane.

**(a)** Figure S4 SEM images and EDS spectra of (a) TA-coated fibers. (b) Pristine SF fibers. After incubation for 12 h, only TA-coated fibers began to emerge homogeneous nanospheres on the surface. EDS spectrum demonstrated the elemental constituents of nanospheres were comprised of calcium and phosphate.

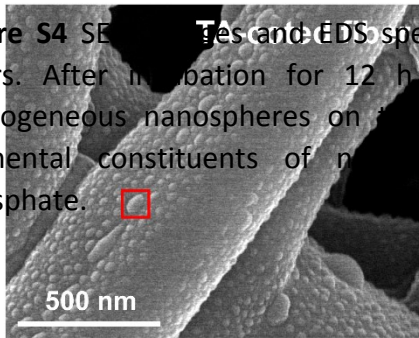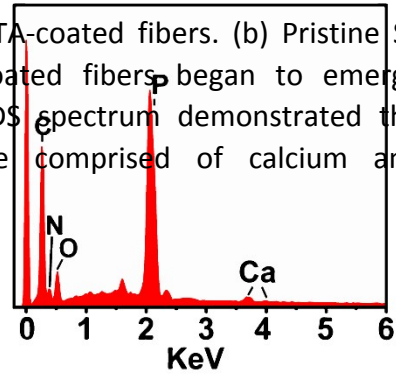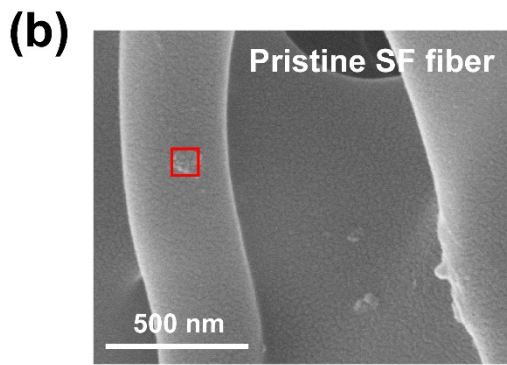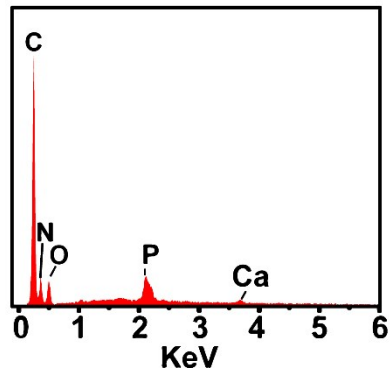

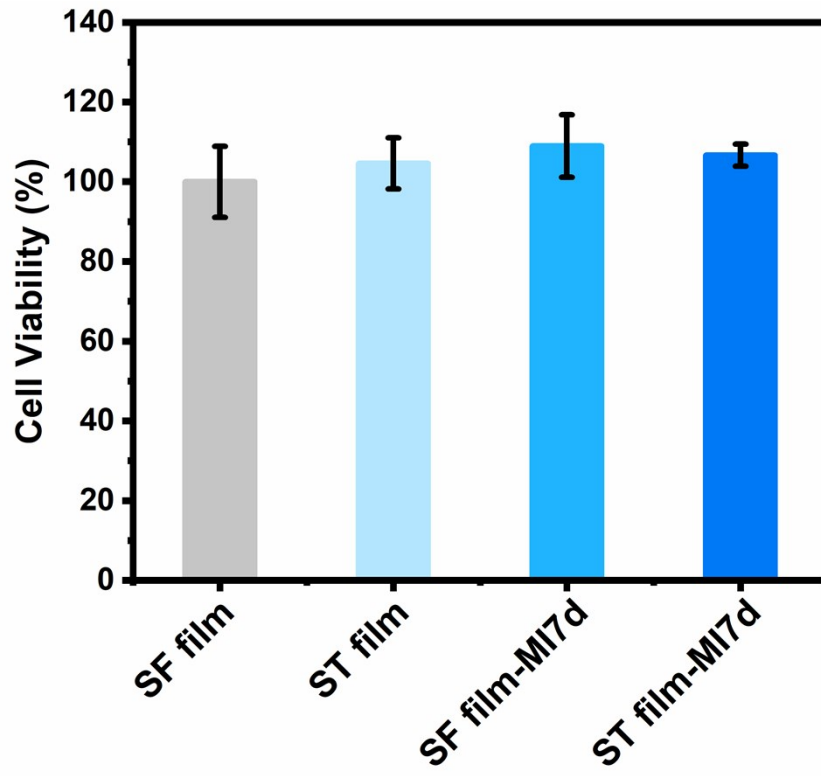

**Figure S5** Cell viability of MC3T3 cells at d 1, indicating there is no significant cytotoxicity.

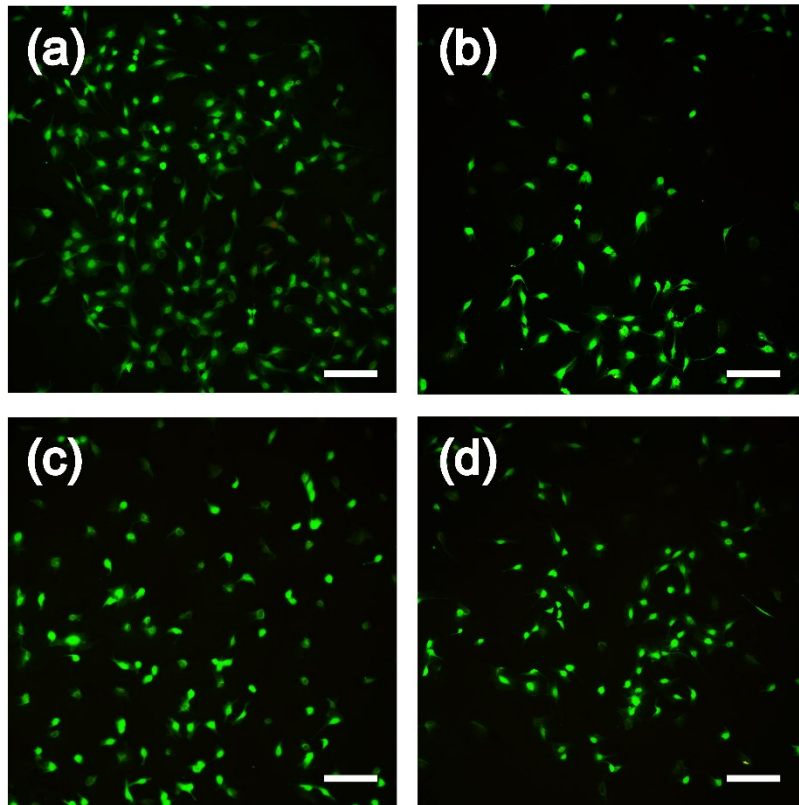

**Figure S6** Representative live/dead cell images of (a) SF film, (b) ST film, (c) SF film-MI7d, and (d) ST film-MI7d. live cells (green, FDA) and dead cells (red, PI). Scale bar = 100  $\mu\text{m}$

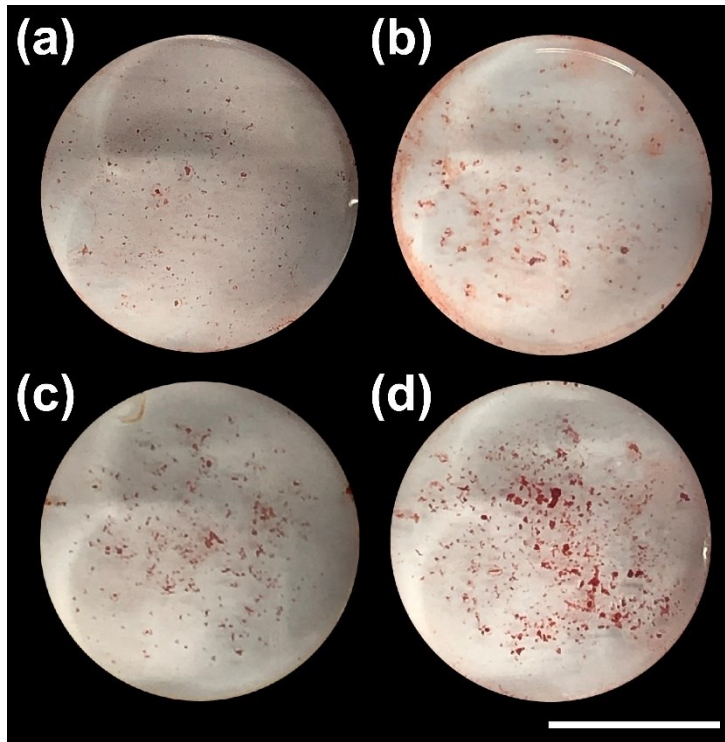

**Figure S7** Images of calcium deposition on extracellular matrix by alizarin red stain. (a) SF film, (b) ST film, (c) SF film-MI7d, and (d) ST film-MI7d. Scale bar = 1 cm
